# Supplementary material
Source: PubMed Central journal article supplement (PMC6931171)
Supplement: 34686_Appendix_1.pdf [file 34686_Appendix_1.pdf]

Appendix 1: Educational Posters



**DONT BE THE WEAK LINK**

**GIVE YOURSELF AND YOUR TEAM THE HEALTHY EDGE!**

---

- Wash or Sanitize before entering training room
- Shower if you have been active
- Disinfect equipment and surfaces before and after use

©2017 GEICO Insurance, Inc. All rights reserved.  
402017 0102017



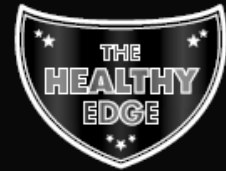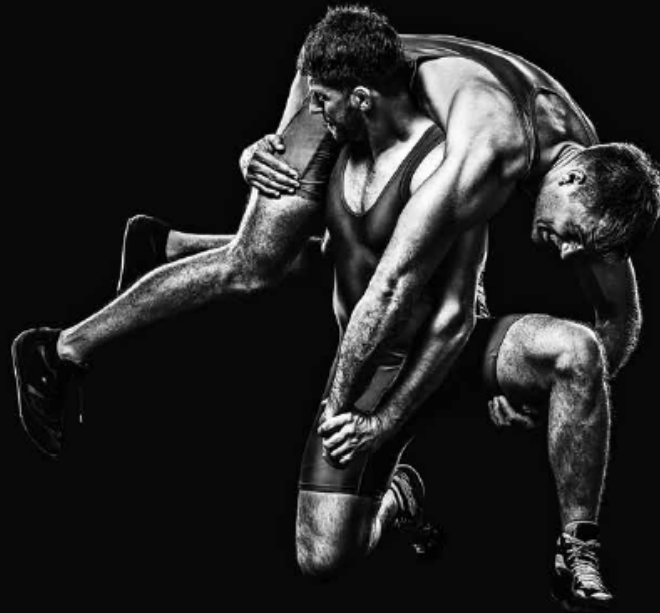

**IT ONLY TAKES  
ONE OF US...**

**TO TAKE DOWN THE TEAM**

**13% OF HEALTHY  
ATHLETES ARE CARRYING  
MRSA EVERYDAY!**

- Wash or sanitize hands often
- Disinfect equipment after every use
- Cover cuts during play
- Share the win, not your water bottle
